# Supplementary material for: Enhanced Stature in the Elderly: The Immediate Impact of Acute Postural Exercises
Source: MDPI journal article supplement (doi:10.3390/sports12030085), 2024-03-20
Supplement: s1 [file s1]

# UNIVERSIDAD AUTÓNOMA DE BAJA CALIFORNIA

## FACULTAD DE MEDICINA Y PSICOLOGÍA

Tijuana, B.C., a 30 de noviembre del 2020  
Oficio, No. 998/2020-2

**DR. MARCO ANTONIO HERNÁNDEZ LEPE**  
PRESENTE.-

Por medio de este conducto, me permito informarle que se sometió a revisión a la Comisión de Bioética de esta Facultad, la solicitud de revisión del proyecto de investigación titulado: **"EFFECT OF A SYSTEMATIC PHYSICAL EXERCISE PROGRAM AND SPIRULINA MAXIMA SUPPLEMENTATION ON THE BODY COMPOSITION, PHYSICAL FUNCTION AND BLOOD LIPID PROFILE IN SEDENTARY OLDER ADULTS WITH EXCESS WEIGHT: A DOUBLE-BLIND, RANDOMIZED, Crossover, PLACEBO CONTROLLED TRIAL"**, el cual tuvo como resultado el siguiente dictamen: **APROBADO** (se anexa).

Sin más por el momento, me despido de usted enviándole un cordial saludo.

ATENTAMENTE  
"POR LA REALIZACIÓN PLENA DEL HOMBRE"

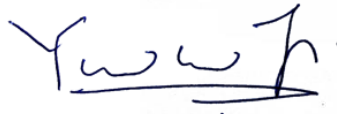

**DRA. JULIETA YADIRA ISLAS LIMÓN**  
DIRECTORA

UNIVERSIDAD AUTÓNOMA  
DE BAJA CALIFORNIA

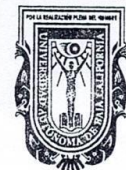

FACULTAD DE MEDICINA  
Y PSICOLOGÍA  
CAMPUS TIJUANA
